# Supplementary material for: A Systematic Review and Meta-Analysis of Dengue Risk with Temperature Change
Source: PubMed Central journal article supplement (PMC4306847; doi:10.3390/ijerph120100001), 2014-12-23
Supplement: ijerph-12-00001-s001.pdf [file ijerph-12-00001-s001.pdf]

# A Systematic Review and Meta-Analysis of Dengue Risk with Temperature Change

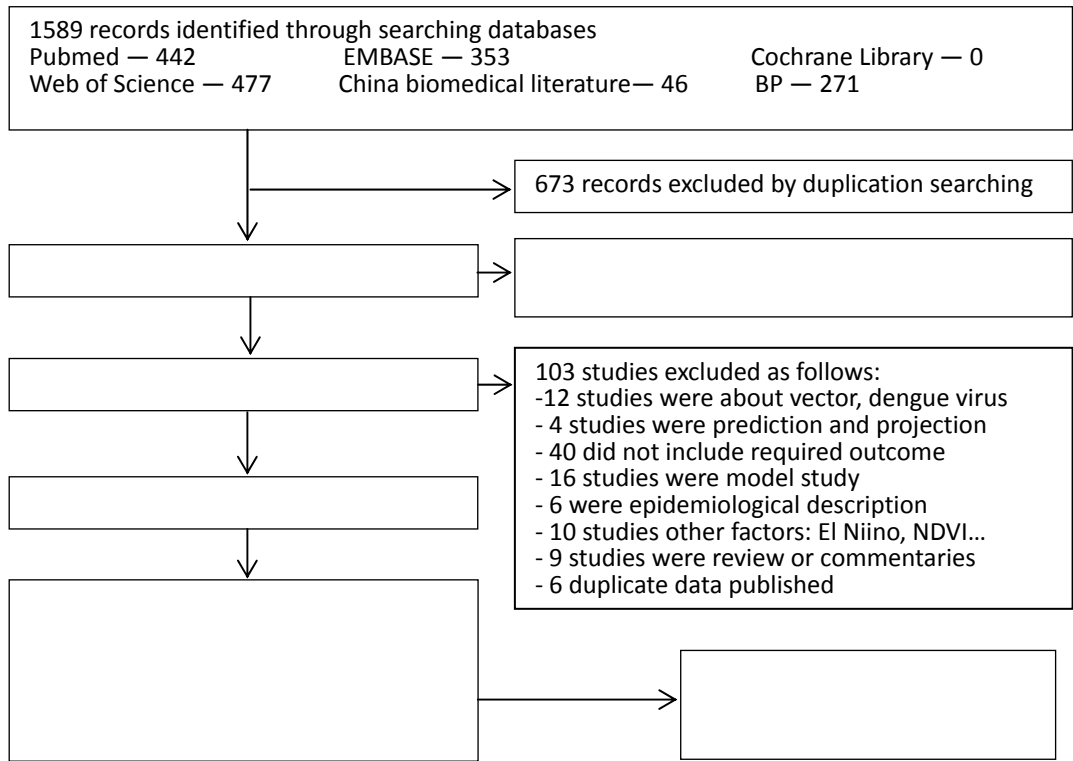

Figure S1. Flowchart of literature research and review process.

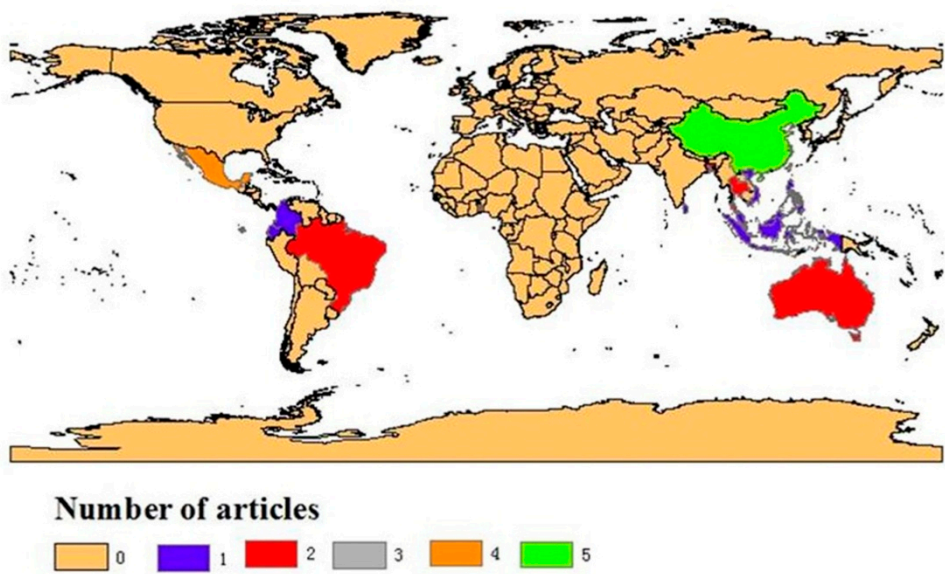

Figure S2. The location of the included articles.

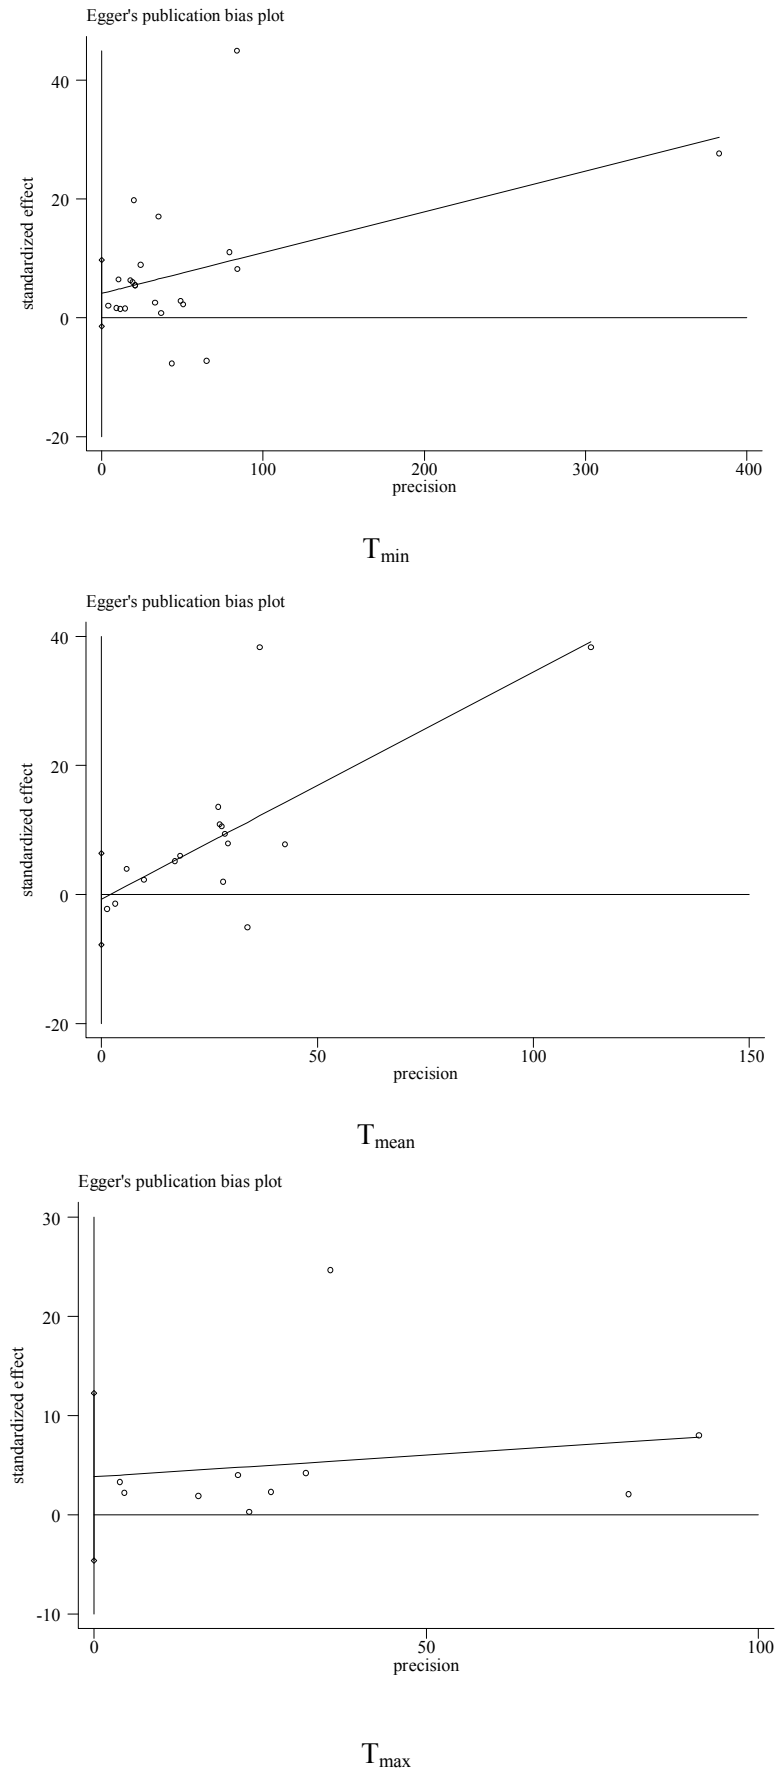

Figure S3. Egger's publication bias plot of the included articles.

**Table S1.** Contextual details of studies included in the meta-analysis by publication year.

| No.  | First Author | Published | Location                 | Period      | Altitude (m) | Climatic Zone | Data Source of Dengue                                         | Data Source of Meteorology                                               | Statistical Method                       | Studied Variable                         | Measure of Effect | Outcome        |
|------|--------------|-----------|--------------------------|-------------|--------------|---------------|---------------------------------------------------------------|--------------------------------------------------------------------------|------------------------------------------|------------------------------------------|-------------------|----------------|
| [1]  | Wu           | 2009      | Taiwan                   | 1998–2006   | 10           | Tropical      | NID Notification Surveillance System                          | Central Weather Bureau in Taiwan                                         | Multiple logistic regression             | $T_{mean}$                               | OR                | Incidence rate |
| [2]  | Lu           | 2009      | Guangzhou                | 2001–2006   | 15           | Subtropical   | Chinese Center for Disease Control and Prevention             | China Meteorological Data Sharing Service System                         | Multivariate Poisson regression          | $T_{min}$                                | $\beta$           | Case           |
| [3]  | Yang         | 2009      | Cixi, China              | 2004.7–2010 | 23           | Subtropical   | Zhejiang Provincial Center for Disease Control and Prevention | Archives of Meteorology, China Meteorological Administration             | N/A                                      | $T_{min}$ $T_{max}$<br>$T_{mean}$        | $p$               | Incidence rate |
| [4]  | Rua-Uribe    | 2013      | Medellin, Colombia       | 2001–2011   | 1500         | Tropical      | Unidades Primarias Generadoras de Datos                       | Meteorología y Estudios Ambientales de Colombia                          | Autoregressive integrated moving average | $T_{min}$ ,<br>$T_{max}$ ,<br>$T_{mean}$ | $p$               | Incidence rate |
| [5]  | Depradine    | 2004      | Barbados                 | 1995–2000   | 10           | Tropical      | N/A                                                           | N/A                                                                      | Multiple linear regression               | $T_{min}$ $T_{max}$<br>$T_{mean}$        | $p$               | Case           |
| [6]  | Promprou     | 2005      | Southern Thailand        | 1993–2002   | 38           | Tropical      | Ministry of Public Health                                     | Climatology Division of the Meteorological Department                    | Multiple linear regression               | $T_{min}$ $T_{max}$<br>$T_{mean}$        | $\beta$           | Incidence rate |
| [7]  | Chowell      | 2006      | Colima, Mexico           | 2002        | 482          | Tropical      | Secretariat of Public Health                                  | Local meteorological offices                                             | Multiple linear regression               | $T_{min}$ $T_{max}$<br>$T_{mean}$        | $\beta$           | Incidence rate |
| [8]  | Hurtado-Daz  | 2006      | Veracruz, Mexico         | 1995–2003   | 10           | Tropical      | Veracruz State Health Ministry                                | National Meteorological Service and Regional Gulf-Central Administration | Second-order polynomial regression       | $T_{min}$                                | $\beta$           | Incidence rate |
| [9]  | Arcari       | 2007      | Indonesia                | 1992–2001   | 16           | Tropical      | Indonesian Ministry of Health                                 | Bureau of Meteorology in Jakarta                                         | Multiple linear regression               | $T_{mean}$                               | $p$               | Incidence rate |
| [10] | Brunkard     | 2008      | Matamoros, Tamaulipas    | 1995–2005   | 1            | Subtropical   | Matamoros, Tamaulipas, Mexico                                 | National Climatic Data Center                                            | Multiple linear regression               | $T_{max}$                                | OR                | Incidence rate |
| [11] | Su           | 2008      | Metro Manila Philippines | 1996–2005   | 13           | Tropical      | National Epidemiology Sentinel Surveillance System            | Philippine Atmospheric, Geophysical, and Astronomical Services           | Multiple linear regression               | $T_{mean}$                               | $p$               | Incidence rate |

Table S1. Cont.

| No.  | First Author   | Published | Location                           | Period                    | Altitude (m) | Climatic Zone | Data Source of Dengue                                   | Data Source of Meteorology                                                          | Statistical Method                                | Studied Variable                  | Measure of Effect | Outcome                   |
|------|----------------|-----------|------------------------------------|---------------------------|--------------|---------------|---------------------------------------------------------|-------------------------------------------------------------------------------------|---------------------------------------------------|-----------------------------------|-------------------|---------------------------|
| [12] | Hsieh          | 2009      | Taiwan                             | e-weeks<br>23–52,<br>2007 | 10           | Tropical      | Taiwan Centers for Disease Control                      | N/A                                                                                 | Richards model                                    | $T_{min}$ $T_{max}$<br>$T_{mean}$ | OR                | Case/<br>Incidence rate   |
| [13] | Chen           | 2010      | Taiwan                             | 2001–<br>2008             | 10           | Tropical      | Taiwan Centers for Disease Control                      | Taiwan Environmental Protection Agency                                              | Multivariate Poisson regression                   | $T_{min}$                         | $\beta$           | Incidence rate            |
| [14] | Sriprom        | 2010      | Sakon Nakhon Province, Thailand    | 2005–<br>2007             | 187          | Tropical      | Sakon Nakhon Provincial Public Health Office            | Sakon Nakhon Meteorological Office                                                  | Generalized Linear Mode                           | $T_{min}$                         | $\beta$           | Incidence rate            |
| [15] | Colon-González | 2011      | Warm and humid provinces of Mexico | 1985–<br>2007             | 580          | Tropical      | National System of Epidemiologic Surveillance in Mexico | Mexican National Meteorological Service                                             | Multiple linear regression                        | $T_{min}$ $T_{max}$               | $\beta$           | Cumulative incidence rate |
| [16] | Gharbi         | 2011      | Guadeloup, French West Indies      | 2000–<br>2007             | 59           | Tropical      | Institut Pasteur in Guadeloupe                          | The meteorological station of Raizet                                                | Seasonal Autoregressive Integrated Moving Average | $T_{min}$ ,<br>$T_{mean}$         | $\beta$           | Incidence rate            |
| [17] | Lai            | 2011      | Kaohsiung, Taiwan                  | 2002–<br>2007             | 9            | Tropical      | Taiwan Centers for Disease Control                      | Taiwan Environmental Protection Administration and Central Weather Bureau           | Duncan’s Multiple Range test                      | $T_{min}$ $T_{max}$               | $p$               | case                      |
| [18] | Pham           | 2011      | Dak Lak, Vietnam                   | 2004–<br>2008             | 600          | Tropical      | Province’s Center for Preventive Health                 | Dak Lak meteorological office                                                       | Multivariate Poisson regression                   | $T_{mean}$                        | $\beta$           | Incidence rate            |
| [19] | Pinto          | 2011      | Singapore                          | 2000–<br>2007             | 23           | Tropical      | Ministry of Health Singapore                            | Climate Diagnostic Center and National Oceanographic and Atmospheric Administration | Multivariate Poisson regression                   | $T_{min}$ , $T_{max}$             | $\beta$           | Incidence rate            |

Table S1. Cont.

| No.  | First Author | Published | Location               | Period    | Altitude (m) | Climatic Zone | Data Source of Dengue                                                                                           | Data Source of Meteorology                                            | Statistical Method                    | Studied Variable               | Measure of Effect | Outcome        |
|------|--------------|-----------|------------------------|-----------|--------------|---------------|-----------------------------------------------------------------------------------------------------------------|-----------------------------------------------------------------------|---------------------------------------|--------------------------------|-------------------|----------------|
| [20] | Earnest      | 2012      | Singapore              | 2001–2008 | 23           | Tropical      | Ministry of Health Singapore                                                                                    | Meteorological Services Division of the National Environment Agency   | Multivariate Poisson regression       | $T_{mean}$                     | $\beta$           | Incidence rate |
| [21] | Gomes        | 2012      | Rio de Janeiro, Brazil | 2001–2009 | 67           | Tropical      | Rio de Janeiro City Health Department                                                                           | Weather Forecasting Center of the National Space Research Institute   | Binomial negative Poisson regression  | $T_{min}$                      | OR                | Case           |
| [22] | Hashizume    | 2012      | Dhaka, Bangladesh      | 2005–2009 | 23           | Tropical      | 11 principal hospitals in the Dhaka Metropolitan area                                                           | Bangladesh Meteorological Department                                  | Generalized linear Poisson regression | $T_{min}$ $T_{max}$ $T_{mean}$ | OR                | Case           |
| [23] | Hii          | 2012      | Singapore              | 2000–2010 | 23           | Tropical      | Ministry of Health Singapore                                                                                    | Climatic Data Center, National Oceanic and Atmospheric Administration | Multivariate Poisson regression       | $T_{mean}$                     | OR                | Case           |
| [24] | Hu           | 2012      | Queensland, Australia  | 2003–2005 | 130          | Tropical      | Queensland Health Department                                                                                    | Australian Bureau of Meteorology                                      | Separate Poisson regression models    | $T_{max}$                      | OR                | Case           |
| [25] | Karim        | 2012      | Dhaka, Bangladesh      | 2000–2007 | 23           | Tropical      | Diseases Control Room of Directorate General of Health Services                                                 | Bangladesh Meteorological Department at Dhaka                         | Multiple linear regression            | $T_{mean}$                     | $\beta$           | Case           |
| [26] | Cheong       | 2013      | Malaysia               | 2008–2010 | 56           | Tropical      | Ministry of Health Malaysia                                                                                     | National Climatic Data Center website                                 | Poisson generalized additive models   | $T_{min}$ , $T_{max}$          | OR                | Case           |
| [27] | Goto         | 2013      | Sri Lanka              | 2005–2011 | 54           | Tropical      | Ministry of Health, Sri Lanka                                                                                   | Department of Meteorology in Sri Lanka                                | The ordinary least squares            | $T_{mean}$                     | $\beta$           | Incidence rate |
| [28] | Huang        | 2013      | Cairns, Australia      | 2000–2009 | 8            | Tropical      | Queensland Health Department                                                                                    | Australian Bureau of Meteorology                                      | Negative-binomial hurdle model        | $T_{min}$                      | OR                | Case           |
| [29] | Li           | 2013      | Guangzhou, China       | 2007–2012 | 15           | Subtropical   | N/A                                                                                                             | N/A                                                                   | Negative binomial regression          | $T_{min}$                      | OR                | Incidence rate |
| [30] | Lowe         | 2013      | Southeast Brazil       | 2001–2009 | 392          | Tropical      | DATASUS ( <a href="http://dtr2004.saude.gov.br/sinanweb/novo/">http://dtr2004.saude.gov.br/sinanweb/novo/</a> ) | Global Precipitation Climatology Project                              | Bayesian general linear mixed model   | $T_{mean}$                     | $\beta$           | Incidence rate |

Table S1. Cont.

| No.  | First Author   | Published | Location         | Period    | Altitude (m) | Climatic Zone | Data Source of Dengue                             | Data Source of Meteorology                       | Statistical Method                     | Studied Variable       | Measure of Effect | Outcome                       |
|------|----------------|-----------|------------------|-----------|--------------|---------------|---------------------------------------------------|--------------------------------------------------|----------------------------------------|------------------------|-------------------|-------------------------------|
| [31] | Stewart-Ibarra | 2013      | El Oro, Ecuador  | 1995–2010 | 6            | Tropical      | Ministry of Health Ecuador                        | National Institute of Meteorology and Hydrology  | Generalized linear mixed model         | <i>Tmin</i>            | OR                | Standardized morbidity ratios |
| [32] | Fan            | 2013      | Guangdong, China | 2005–2011 | 15           | Subtropical   | National Noticeable Disease Surveillance System   | China Meteorological Data Sharing Service System | Time-stratified case-crossover model   | <i>Tmin Tmax Tmean</i> | OR                | Case                          |
| [33] | Wang           | 2013      | Guangzhou, China | 2000–2012 | 15           | Subtropical   | Chinese Center for Disease Control and Prevention | China Meteorological Data Sharing Service System | Zero-inflated Poisson Regression Model | <i>Tmin</i>            | $\beta$           | Case                          |

Note: N/A = not applicable.

Table S2. Quality assessment of selected studies.

| Author                         | Year | Generalizability | Description of Temperature | Dengue Cases or Incidence | Source of Dengue Data | Reporting Bias | Limitation | Multiple Lag | Adjusted for Time Trend | Adjusted for Seasonality | Fund Supporting |
|--------------------------------|------|------------------|----------------------------|---------------------------|-----------------------|----------------|------------|--------------|-------------------------|--------------------------|-----------------|
| Wu <i>et al.</i> [1]           | 2009 | 1                | 1                          | 1                         | 1                     | 1              | 1          | 1            | 1                       | 1                        | 0               |
| Lu <i>et al.</i> [2]           | 2009 | 1                | 1                          | 1                         | 1                     | 1              | 0          | 1            | 0                       | 0                        | 1               |
| Yang <i>et al.</i> [3]         | 2009 | 0                | 1                          | 1                         | 1                     | 1              | 1          | N/A          | N/A                     | N/A                      | 1               |
| Rua-Uribe <i>et al.</i> [4]    | 2013 | 1                | 1                          | 1                         | 1                     | 1              | 0          | 1            | 0                       | 0                        | 0               |
| Depradine <i>et al.</i> [5]    | 2004 | 1                | 0                          | 1                         | 1                     | 1              | 0          | 1            | 1                       | 0                        | 0               |
| Promprou <i>et al.</i> [6]     | 2005 | 1                | 1                          | 1                         | 1                     | 1              | 0          | 0            | 0                       | 0                        | 1               |
| Chowell <i>et al.</i> [7]      | 2006 | 1                | 1                          | 1                         | 1                     | 1              | 1          | 1            | 1                       | 1                        | 0               |
| Hurtado-Daiz <i>et al.</i> [8] | 2006 | 1                | 1                          | 1                         | 1                     | 1              | 1          | 1            | 1                       | 1                        | 0               |
| Arcari <i>et al.</i> [9]       | 2007 | 1                | 1                          | 1                         | 1                     | 1              | 1          | 1            | 0                       | 1                        | 0               |
| Brunkard <i>et al.</i> [10]    | 2008 | 1                | 1                          | 1                         | 1                     | 1              | 1          | 1            | 0                       | 0                        | 0               |
| Su [11]                        | 2008 | 1                | 0                          | 1                         | 1                     | 1              | 0          | 0            | 0                       | 0                        | 0               |
| Hsieh <i>et al.</i> [12]       | 2009 | 1                | 1                          | 1                         | 1                     | 1              | 0          | 1            | 1                       | 0                        | 1               |

Table S2. Cont.

| Author                             | Year | Generalizability | Description of Temperature | Dengue Cases or Incidence | Source of Dengue Data | Reporting Bias | Limitation | Multiple Lag | Adjusted for Time Trend | Adjusted for Seasonality | Fund Supporting |
|------------------------------------|------|------------------|----------------------------|---------------------------|-----------------------|----------------|------------|--------------|-------------------------|--------------------------|-----------------|
| Chen <i>et al.</i> [13]            | 2010 | 1                | 1                          | 1                         | 1                     | 1              | 1          | 1            | 0                       | 0                        | 0               |
| Sriprom <i>et al.</i> [14]         | 2010 | 1                | 1                          | 1                         | 1                     | 1              | 0          | 0            | 0                       | 0                        | 0               |
| Colon- González <i>et al.</i> [15] | 2011 | 1                | 1                          | 1                         | 1                     | 1              | 1          | 1            | 1                       | 1                        | 1               |
| Gharbi <i>et al.</i> [16]          | 2011 | 1                | 1                          | 1                         | 1                     | 1              | 1          | 1            | 1                       | 1                        | 0               |
| Lai [17]                           | 2011 | 1                | 1                          | 1                         | 1                     | 1              | 0          | 1            | 0                       | 0                        | 0               |
| Pham <i>et al.</i> [18]            | 2011 | 1                | 1                          | 1                         | 1                     | 1              | 1          | 0            | 0                       | 0                        | 0               |
| Pinto <i>et al.</i> [19]           | 2011 | 1                | 1                          | 1                         | 1                     | 1              | 1          | 1            | 0                       | 0                        | 0               |
| Earnest <i>et al.</i> [20]         | 2012 | 1                | 1                          | 1                         | 1                     | 1              | 1          | 1            | 1                       | 1                        | 1               |
| Gomes <i>et al.</i> [21]           | 2012 | 1                | 1                          | 1                         | 1                     | 1              | 1          | 1            | 0                       | 1                        | 0               |
| Hashizume <i>et al.</i> [22]       | 2012 | 1                | 1                          | 1                         | 1                     | 1              | 1          | 1            | 1                       | 1                        | 1               |
| Hii <i>et al.</i> [23]             | 2012 | 1                | 1                          | 1                         | 1                     | 1              | 1          | 1            | 0                       | 0                        | 1               |
| Hu <i>et al.</i> [24]              | 2012 | 1                | 1                          | 1                         | 1                     | 1              | 1          | 0            | 0                       | 0                        | 1               |
| Karim <i>et al.</i> [25]           | 2012 | 1                | 1                          | 1                         | 1                     | 1              | 0          | 0            | 1                       | 1                        | 0               |
| Cheong <i>et al.</i> [26]          | 2013 | 1                | 1                          | 1                         | 1                     | 1              | 0          | 1            | 1                       | 1                        | 0               |
| Goto <i>et al.</i> [27]            | 2013 | 1                | 1                          | 1                         | 1                     | 1              | 1          | 1            | 0                       | 0                        | 1               |
| Huang <i>et al.</i> [28]           | 2013 | 1                | 1                          | 1                         | 1                     | 1              | 1          | 1            | 0                       | 1                        | 1               |
| Li <i>et al.</i> [29]              | 2013 | 1                | 1                          | 1                         | 0                     | 1              | 1          | 1            | 0                       | 0                        | 1               |
| Lowe <i>et al.</i> [30]            | 2013 | 1                | 1                          | 1                         | 1                     | 1              | 1          | 1            | 1                       | 1                        | 1               |
| Stewart-Ibarra <i>et al.</i> [31]  | 2013 | 1                | 1                          | 1                         | 1                     | 1              | 0          | 1            | 0                       | 0                        | 1               |
| Fan <i>et al.</i> [32]             | 2013 | 1                | 1                          | 1                         | 1                     | 1              | 1          | 1            | 1                       | 1                        | 1               |
| Wang <i>et al.</i> [33]            | 2013 | 1                | 1                          | 1                         | 1                     | 1              | 1          | 1            | 0                       | 0                        | 1               |

Notes: N/A = not applicable; 1 = yes; 0 = no.

## References

1. Wu, P.C.; Lay, J.G.; Guo, H.R.; Lin, C.Y.; Lung, S.C.; Su, H.J. Higher temperature and urbanization affect the spatial patterns of dengue fever transmission in subtropical Taiwan. *Sci. Total Environ.* **2009**, *407*, 2224–2233.
2. Lu, L.; Lin, H.L.; Tian, L.W.; Yang, W.Z.; Sun, J.M.; Liu, Q.Y. Time series analysis of dengue fever and weather in Guangzhou, China. *BMC Public Health* **2009**, *9*, 395–399.
3. Yang, T.C.; Lu, L.; Fu, G.M.; Zhong, S.; Ding, G.Q.; Xu, R.; Zhu, G.F.; Shi, N.F.; Fan, F.L.; Liu, Q.Y. Epidemiology and vector efficiency during a dengue fever outbreak in Cixi, Zhejiang Province, China. *J. Vector Ecol.* **2009**, *34*, 148–154.
4. Rua-Urbe, G.L.; Suarez-Acosta, C.; Chauca, J.; Ventosilla, P.; Almanza, R. Modelling the effect of local climatic variability on dengue transmission in Medellin (Colombia) by means temporary series analysis. *Biomedica* **2013**, *33*, 142–152.
5. Depradine, C.A.; Lovell, E.H. Climatological variables and the incidence of dengue fever in Barbados. *Int. J. Environ. Health Res.* **2004**, *14*, 429–441.
6. Promprou, S.; Jaroensutasinee, M.; Jaroensutasinee, K. Climatic factors affecting dengue haemorrhagic fever incidence in southern Thailand. *Dengue Bull.* **2005**, *29*, 41–48.
7. Chowell, G.; Sanchez, F. Climate-based descriptive models of dengue fever: The 2002 epidemic in Colima, Mexico. *J. Environ. Health* **2006**, *68*, 40–44.
8. Hurtado-Daiz, M.; Riojas-Rodriguez, H.; Rothenberg, S.; Gomez-Dantes, H.; Cifuentes, E. Impact of climate variability on the incidence of dengue in Mexico. *Trop. Med. Int. Health* **2007**, *12*, 1327–1337.
9. Arcari, P.; Tapper, N.; Pfueller, S. Regional variability in relationships between climate and dengue/DHF in Indonesia. *Singap. J. Trop. Geogr.* **2007**, *28*, 251–272.
10. Brunkard, J.M.; Cifuentes, E.; Rothenberg, S.J. Assessing the roles of temperature, precipitation, and ENSO in dengue re-emergence on the Texas-Mexico border region. *Salud. Publ. Mex.* **2008**, *50*, 227–234.
11. Su, G. L. Correlation of climatic factors and dengue incidence in Metro Manila, Philippines. *Ambio* **2008**, *37*, 292–294.
12. Hsieh, Y.H.; Chen, C.W. Turning points, reproduction number, and impact of climatological events for multi-wave dengue outbreaks. *Trop. Med. Int. Health* **2009**, *14*, 628–638.
13. Chen, S.C.; Liao, C.M.; Chio, C.P.; Chou, H.H.; You, S.H.; Cheng, Y.H. Lagged temperature effect with mosquito transmission potential explains dengue variability in southern Taiwan: Insights from a statistical analysis. *Sci. Total Environ.* **2010**, *408*, 4069–4075.
14. Sriprom, M.; Chalvet-Monfray, K.; Chaimane, T.; Vongsawat, K.; Bicout, D.J. Monthly district level risk of dengue occurrences in Sakon Nakhon Province, Thailand. *Sci. Total Environ.* **2010**, *408*, 5521–5528.
15. Colon-Gonzalez, F.J.; Lake, I.R.; Bentham, G. Climate variability and dengue fever in warm and humid Mexico. *Amer. J. Trop. Med. Hyg.* **2011**, *84*, 757–763.
16. Gharbi, M.; Quenel, P.; Gustave, J.; Cassadou, S.; Ruche, G.L.; Girdary, L.; Marrama, L. Time series analysis of dengue incidence in Guadeloupe, French West Indies: Forecasting models using climate variables as predictors. *BMC Infect. Dis.* **2011**, *11*, doi:10.1186/1471-2334-11-166.



17. Lai, L.W. Influence of environmental conditions on asynchronous outbreaks of dengue disease and increasing vector population in Kaohsiung, Taiwan. *Int. J. Environ. Health Res.* **2011**, *21*, 133–146.
18. Pham, H.V.; Doan, H.T.; Phan, T.T.; Minh, N.N. Ecological factors associated with dengue fever in a Central Highlands province, Vietnam. *BMC Infect. Dis.* **2011**, *11*, doi:10.1186/1471-2334-11-172.
19. Pinto, E.; Coelho, M.; Oliver, L.; Massad, E. The influence of climate variables on dengue in Singapore. *Int. J. Environ. Health Res.* **2011**, *21*, 415–426.
20. Earnest, A.; Tan, S.B.; Wilder-Smith, A. Meteorological factors and El Niño southern oscillation are independently associated with dengue infections. *Epidemiol. Infect.* **2012**, *140*, 1244–1251.
21. Gomes, A.F.; Nobre, A.A.; Cruz, O.G. Temporal analysis of the relationship between dengue and meteorological variables in the city of Rio de Janeiro, Brazil, 2001–2009. *Cad. Saude. Publ.* **2012**, *28*, 2189–2197.
22. Hashizume, M.; Dewan, A.M.; Sunahara, T.; Rahman, M.Z.; Yamamoto, T. Hydroclimatological variability and dengue transmission in Dhaka, Bangladesh: A time-series study. *BMC Infect. Dis.* **2012**, *12*, doi:10.1186/1471-2334-12-98.
23. Hii, Y.L.; Rocklöv, J.; Wall, S.; Ng, L.C.; Tang, C.S.; Ng, N. Optimal lead time for dengue forecast. *PLoS Negl. Trop. Dis.* **2012**, *6*, doi:10.1371/journal.pntd.0001848.
24. Hu, W.B.; Clements, A.; Williams, G.; Tong, S.L.; Mengersen, K. Spatial patterns and socioecological drivers of dengue fever transmission in Queensland, Australia. *Environ. Health Perspect.* **2012**, *120*, 260–266.
25. Karim, M.N.; Munshi, S.U.; Anwar, N.; Alam, M.S. Climatic factors influencing dengue cases in Dhaka city: A model for dengue prediction. *Indian J. Med. Res.* **2012**, *136*, 32–39.
26. Cheong, Y.L.; Burkart, K.; Leitão, P.J.; Lakes, T. Assessing weather effects on dengue disease in Malaysia. *Int. J. Environ. Res. Public Health.* **2013**, *10*, 6319–6334.
27. Goto, K.; Kumarendran, B.; Mettananda, S.; Gunasekara, D.; Fujii, Y.; Kaneko, S. Analysis of effects of meteorological factors on dengue incidence in Sri Lanka using time series data. *PLoS One* **2013**, *8*, doi:10.1371/journal.pone.0063717.
28. Huang, X.; Williams, G.; Clements, A.C.; Hu, W. Imported dengue cases, weather variation and autochthonous dengue incidence in Cairns, Australia. *PLoS One* **2013**, *8*, doi:10.1371/journal.pone.0081887.
29. Li T.G.; Yang Z.C.; Luo, L.; Di, B.; Wang, M. Dengue fever epidemiological status and relationship with meteorological variables in Guangzhou, southern China, 2007–2012. *Biomed. Environ. Sci.* **2013**, *26*, 994–997.
30. Lowe, R.; Bailey, T.C.; Stephenson, D.B.; Jupp, T.E.; Graham, R.J.; Barcellos, C.; Carvalho, M.S. The development of an early warning system for climate-sensitive disease risk with a focus on dengue epidemics in southeast Brazil. *Stat. Med.* **2013**, *32*, 864–883.
31. Stewart-Ibarra, A.M.; Lowe, R. Climate and non-climate drivers of dengue epidemics in southern coastal Ecuador. *Amer. J. Trop. Med. Hyg.* **2013**, *88*, 971–981.
32. Fan, J.C.; Lin, H.L.; Wang, C.G.; Bai, L.; Yang, S.R.; Chu, C.; Yang, W.Z.; Liu, Q.Y. Identifying the high-risk areas and associated meteorological factors of dengue transmission in Guangdong Province, China from 2005 to 2011. *Epidemiol. Infect.* **2014**, *142*, 634–643.

33. Wang, C.G.; Jiang, B.F.; Fan, J.C.; Wang, F.R.; Liu, Q.Y. A study of the dengue epidemic and meteorological factors in Guangzhou, China, by using a zero-inflated poisson regression model. *Asia Pac. J. Public Health* **2014**, *26*, 48–57.

© 2014 by the authors; licensee MDPI, Basel, Switzerland. This article is an open access article distributed under the terms and conditions of the Creative Commons Attribution license (<http://creativecommons.org/licenses/by/4.0/>).
